# Supplementary material for: Effect of Light Conditions, Trichoderma Fungi and Food Polymers on Growth and Profile of Biologically Active Compounds in Thymus vulgaris and Thymus serpyllum
Source: MDPI journal article supplement (doi:10.3390/ijms25094846), 2024-04-29
Supplement: s1 [file s1]

## *T. vulgaris*

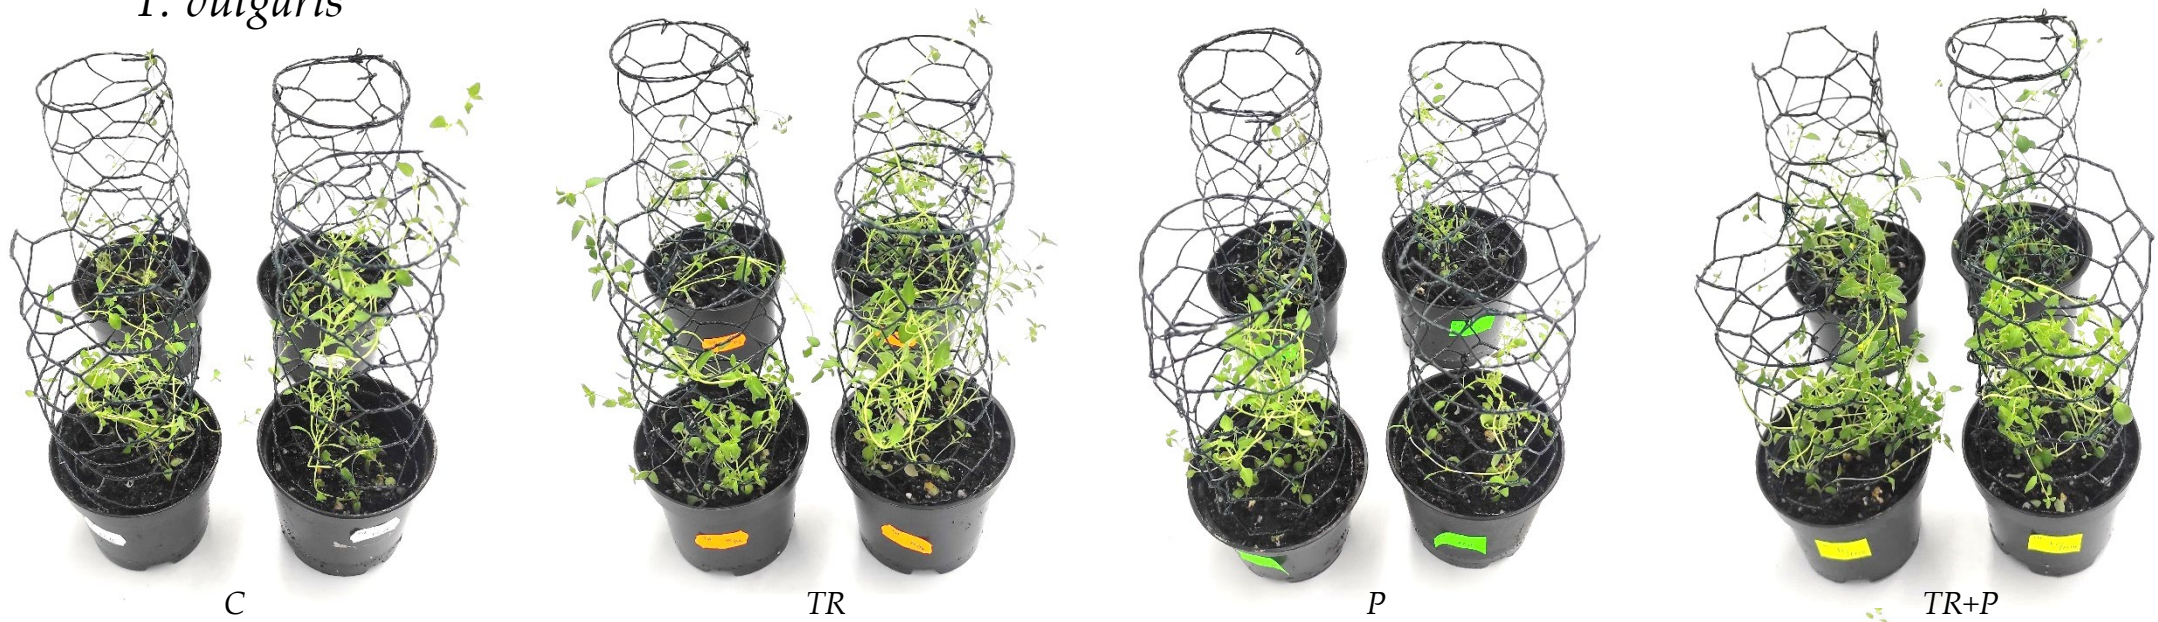

## *T. serpyllum*

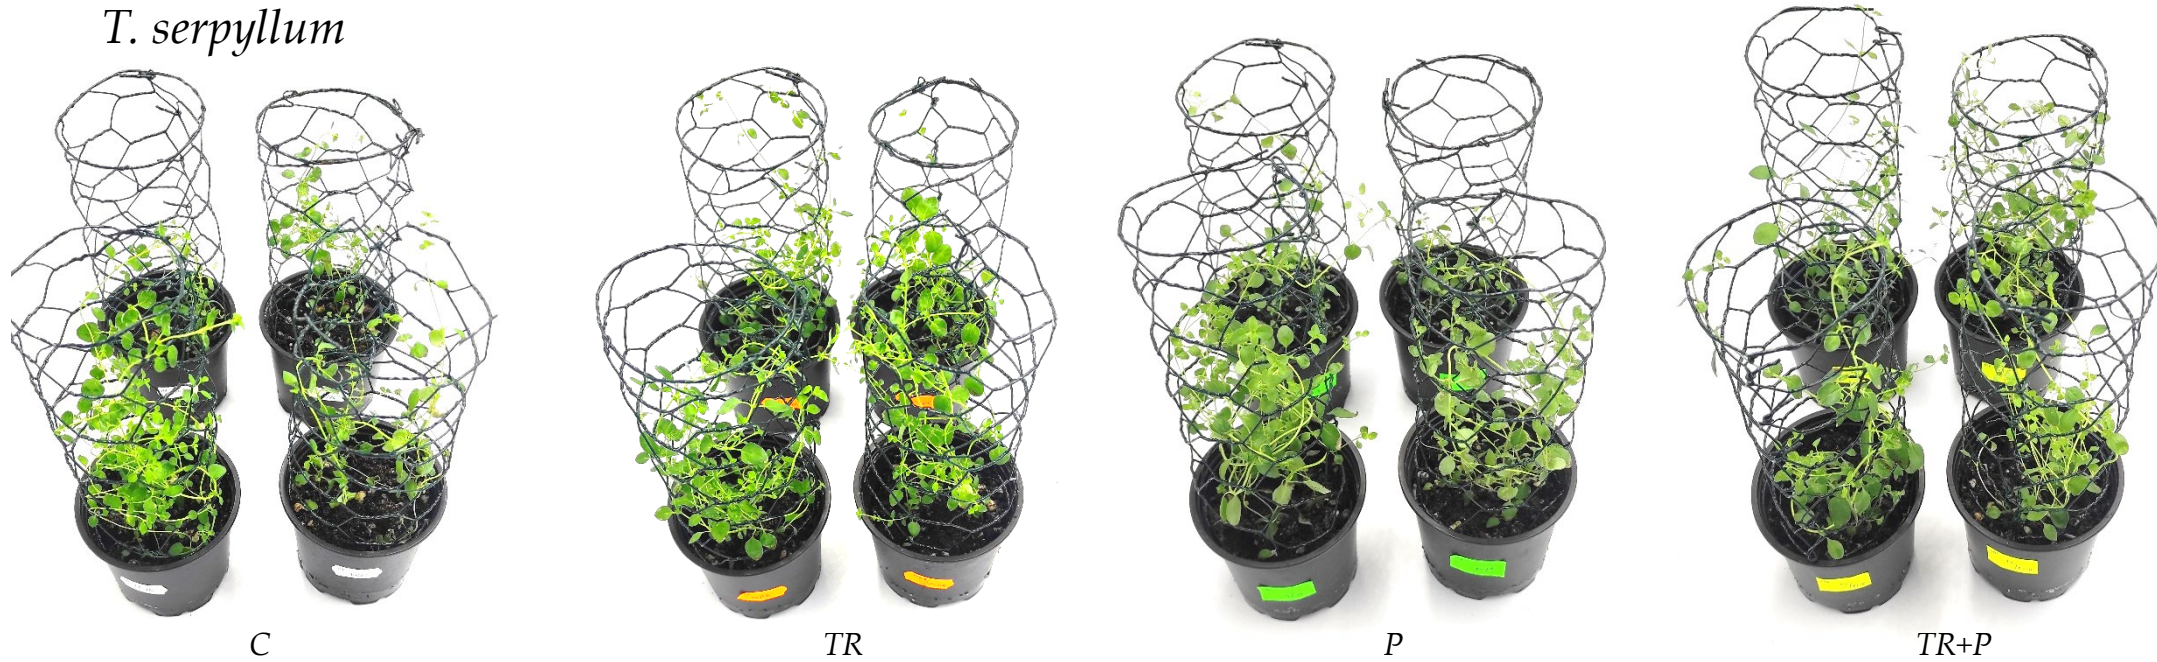

**Figure S1.** *T. vulgaris* and *T. serpyllum* plants cultivated in the semi-controlled conditions. Abbreviations: C, control plants, TR, plants grown in the soil supplemented with *Trichoderma*, P, plants grown in the soil supplemented with food polymers, TR+P, plants grown in the soil supplemented with *Trichoderma* and food polymers.



*T. vulgaris*

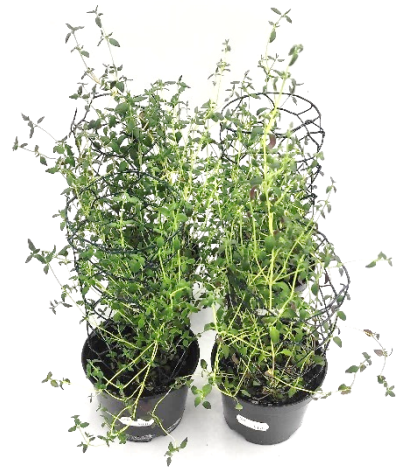

C

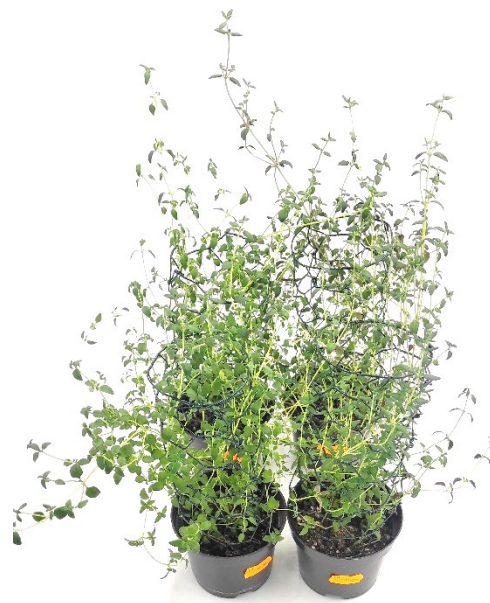

TR

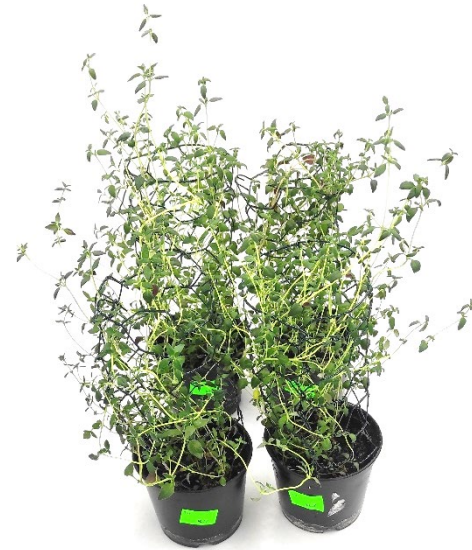

P

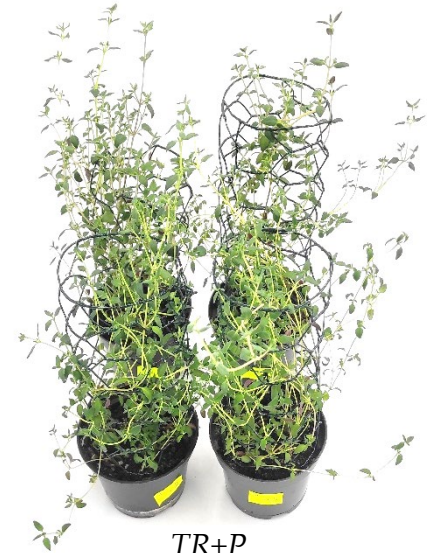

TR+P

*T. serpyllum*

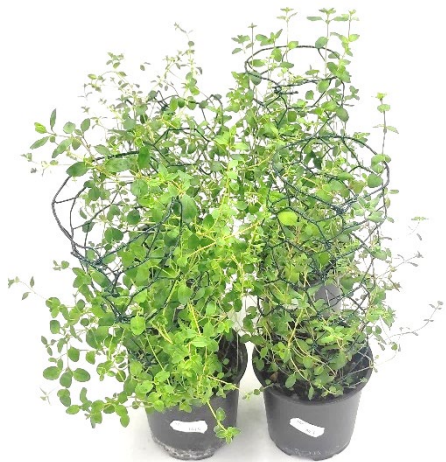

C

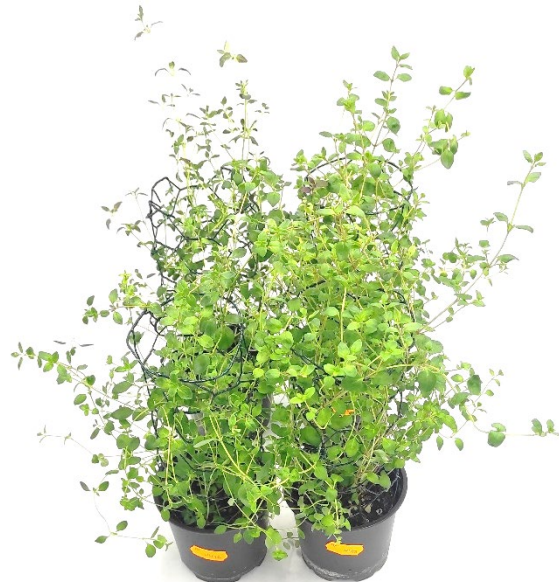

TR

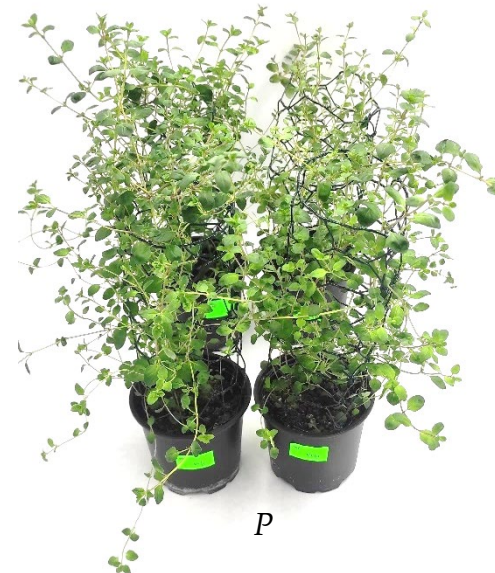

P

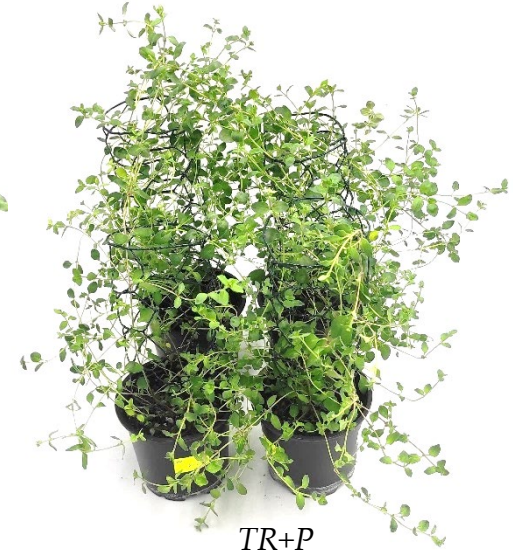

TR+P

**Figure S2.** *T. vulgaris* and *T. serpyllum* plants cultivated in the controlled conditions, with lighting  $174 \mu\text{mol}\cdot\text{m}^{-2} \text{s}^{-1}$ . Abbreviations: C, control plants, TR, plants grown in the soil supplemented with *Trichoderma*, P, plants grown in the soil supplemented with food polymers, TR+P, plants grown in the soil supplemented with *Trichoderma* and food polymers.



*T. vulgaris*

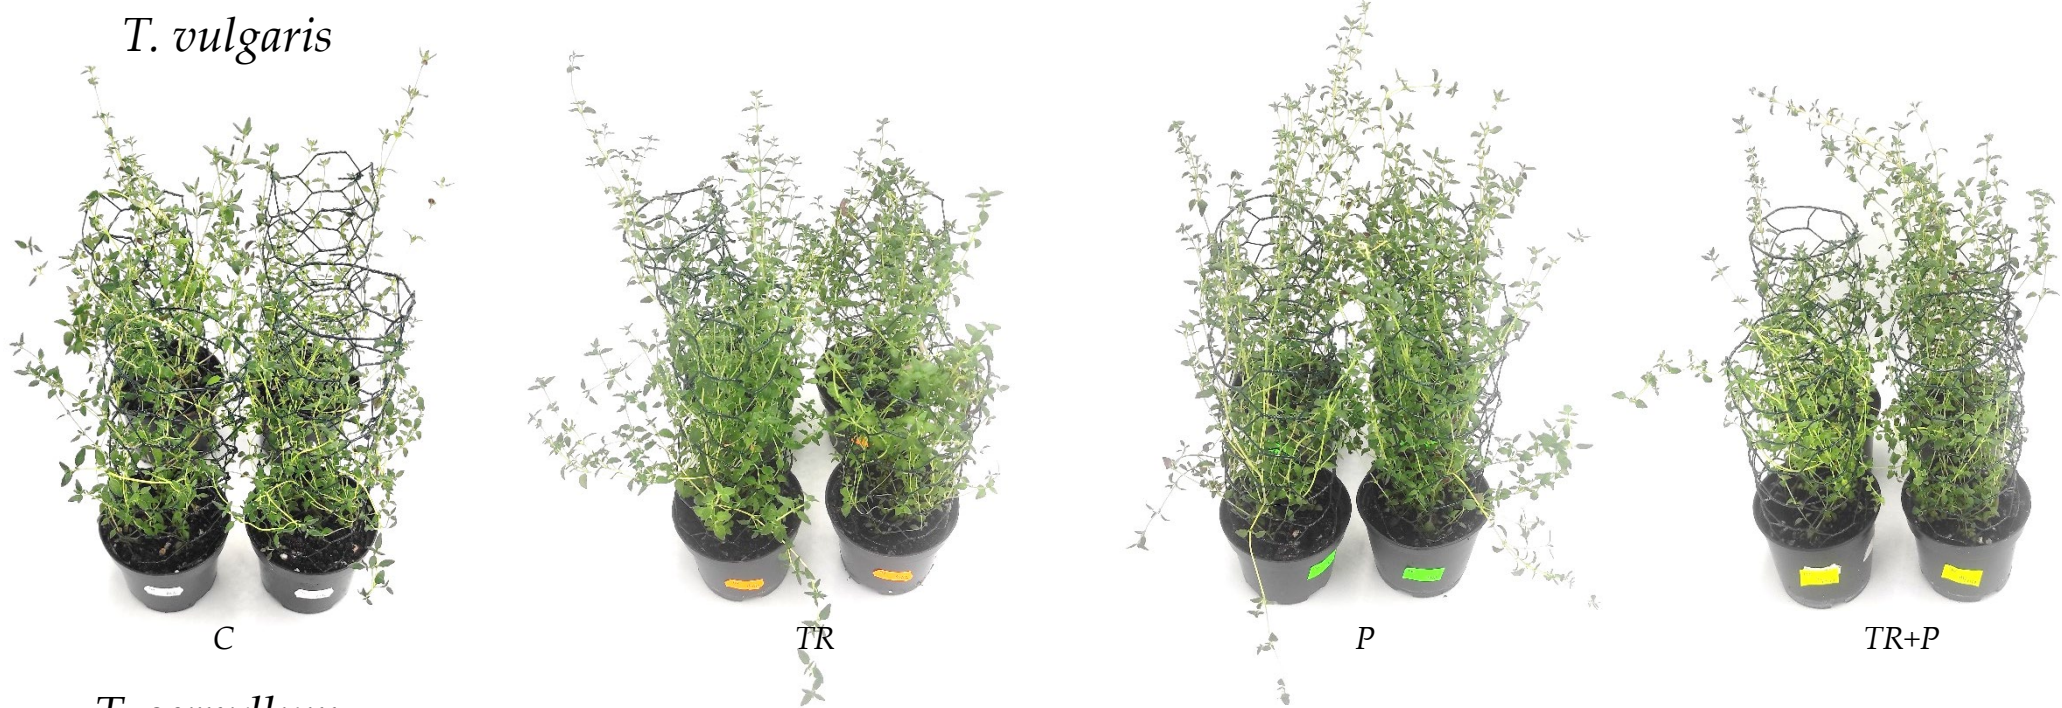

*T. serpyllum*

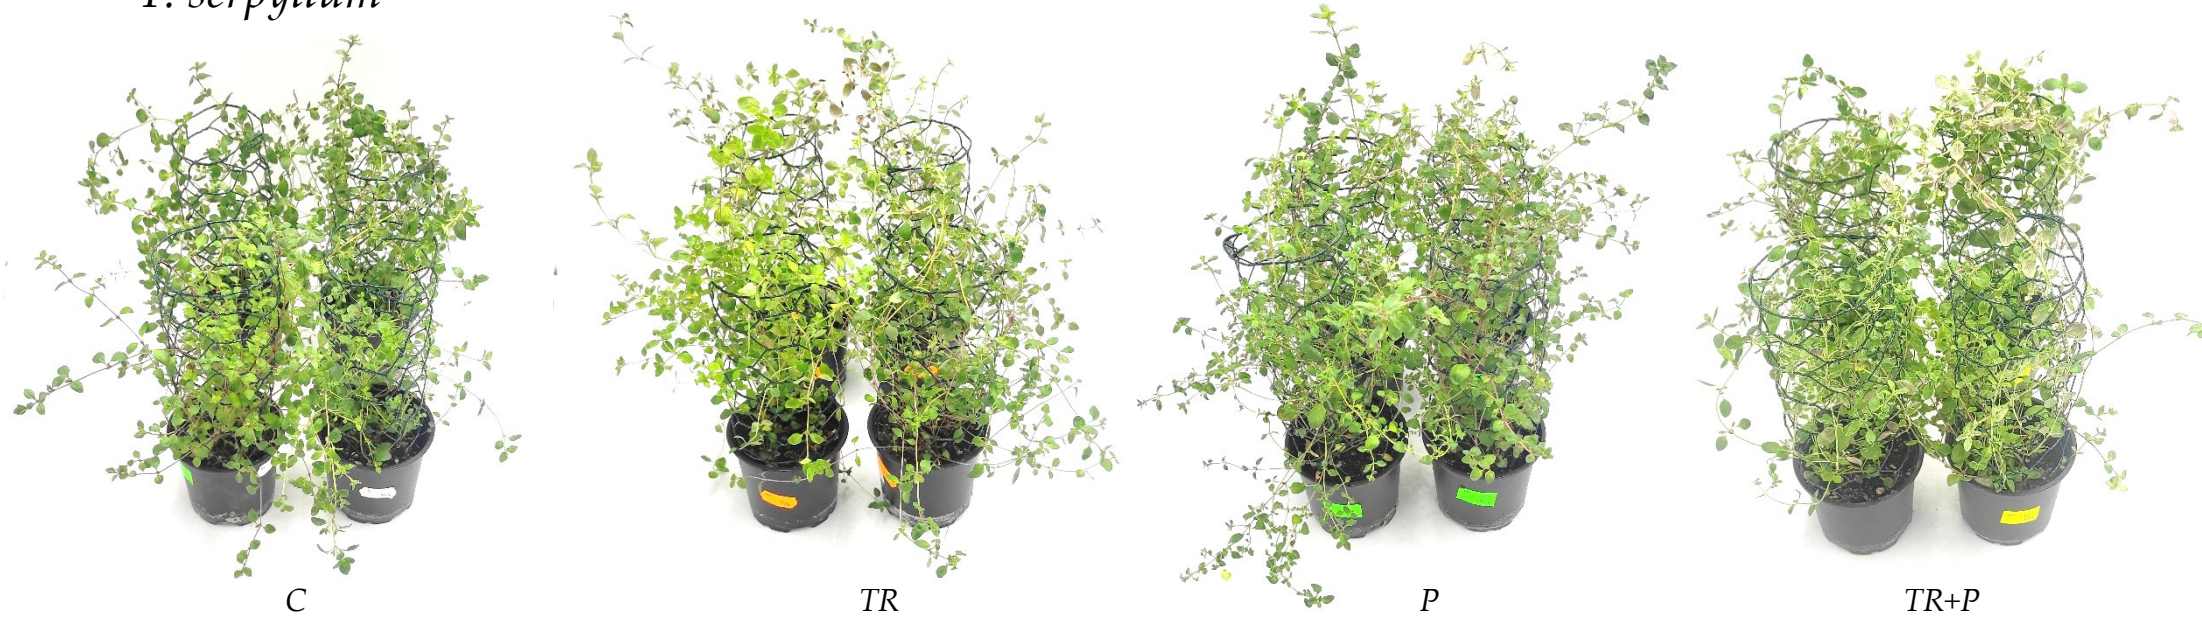

**Figure S3.** *T. vulgaris* and *T. serpyllum* plants cultivated in the controlled conditions, with lighting  $600 \mu\text{mol}\cdot\text{m}^{-2} \text{s}^{-1}$ . Abbreviations: C, control plants, TR, plants grown in the soil supplemented with *Trichoderma*, P, plants grown in the soil supplemented with food polymers, TR+P, plants grown in the soil supplemented with *Trichoderma* and food polymers.

**Table S1.** Results of a two-way ANOVA investigating the effects of the treatments studied on the tested parameters of *T. vulgaris* (a) and *T. serpyllum* (b) plants. Significance was indicated by an asterisk as follows (\*  $p < 0.05$ ; \*\*  $p < 0.01$ ; \*\*\*  $p < 0.001$ ).

(a)

| Dependent variable                                       | F value and significance |                            |                |
|----------------------------------------------------------|--------------------------|----------------------------|----------------|
|                                                          | Lighting (L; df = 2)     | Soil treatment (T; df = 3) | L x T (df = 6) |
| Shoot biomass/FW [g]                                     | 59.08 ***                | 1.44                       | 1.82           |
| Length of shoot [cm]                                     | 10.60 ***                | 0.76                       | 2.60 *         |
| Content of chlorophyll a [mg g <sup>-1</sup> FW]         | 1.32                     | 0.87                       | 2.62 *         |
| Content of chlorophyll b [mg g <sup>-1</sup> FW]         | 0.05                     | 0.74                       | 3.48 *         |
| Content of carotenoids [mg g <sup>-1</sup> FW]           | 18.91 ***                | 0.44                       | 2.81 *         |
| Content of anthocyanins [mg g <sup>-1</sup> FW]          | 30.58 ***                | 0.17                       | 2.77 *         |
| Content of phenolics [mg g <sup>-1</sup> FW]             | 409.37 ***               | 9.93 ***                   | 5.80 ***       |
| Content of flavonoids [mg g <sup>-1</sup> FW]            | 44.15 ***                | 5.42 **                    | 8.73 ***       |
| Total antioxidant capacity [ $\mu$ M g <sup>-1</sup> FW] | 297.35 ***               | 20.96 ***                  | 13.38 ***      |
| Content of terpenoids [mg g <sup>-1</sup> FW]            | 7.06 ***                 | 9.81 ***                   | 6.78 ***       |

(b)

| Dependent variable                                       | F value and significance |                            |                |
|----------------------------------------------------------|--------------------------|----------------------------|----------------|
|                                                          | Lighting (L; df = 2)     | Soil treatment (T; df = 3) | L x T (df = 6) |
| Shoot biomass/FW [g]                                     | 32.62 ***                | 2.39 *                     | 0.76           |
| Length of shoot [cm]                                     | 43.74 ***                | 2.76 **                    | 1.16           |
| Content of chlorophyll a [mg g <sup>-1</sup> FW]         | 48.08 ***                | 4.99 **                    | 3.87 **        |
| Content of chlorophyll b [mg g <sup>-1</sup> FW]         | 18.35 ***                | 1.21 *                     | 1.49 *         |
| Content of carotenoids [mg g <sup>-1</sup> FW]           | 0.79                     | 0.34                       | 1.81           |
| Content of anthocyanins [mg g <sup>-1</sup> FW]          | 2.74 *                   | 1.75                       | 1.27           |
| Content of phenolics [mg g <sup>-1</sup> FW]             | 172.87 ***               | 5.03 **                    | 2.90 *         |
| Content of flavonoids [mg g <sup>-1</sup> FW]            | 88.37 ***                | 11.73 **                   | 6.15 ***       |
| Total antioxidant capacity [ $\mu$ M g <sup>-1</sup> FW] | 767.16 ***               | 16.60 **                   | 5.49 ***       |
| Content of terpenoids [mg g <sup>-1</sup> FW]            | 11.81 ***                | 2.85 *                     | 7.52 ***       |
